# Supplementary material for: Subcellular spectroscopic markers, topography and nanomechanics of human lung cancer and breast cancer cells examined by combined confocal Raman microspectroscopy and atomic force microscopy
Source: Royal Society of Chemistry journal article supplement (doi:10.1039/c2an36359c), 2012-11-05
Supplement: c2an36359c.pdf [file c2an36359c.pdf]

Cite this: DOI: 10.1039/c0xx00000x

www.rsc.org/xxxxxx

ARTICLE TYPE

# Subcellular Spectroscopic Markers, Topography and Nanomechanics of Human Lung Cancer and Breast Cancer Cells Examined by Combined Confocal Raman microspectroscopy and Atomic Force Microscopy

Gerald D. McEwen <sup>‡,§,a</sup>, Yangzhe Wu <sup>‡,¶,a</sup>, Mingjie Tang <sup>a</sup>, Xiaojun Qi <sup>b</sup>, Zhongmiao Xiao <sup>b</sup>,  
 Sherry M. Baker <sup>c</sup>, Tian Yu <sup>c</sup>, Timothy A. Gilbertson <sup>c</sup>, Daryll B. DeWald <sup>||,c</sup>, Anhong Zhou <sup>\*,a</sup>

Received (in XXX, XXX) Xth XXXXXXXXX 20XX, Accepted Xth XXXXXXXXX 20XX

DOI: 10.1039/b000000x

## Supplementary Materials

### Supplementary Figures

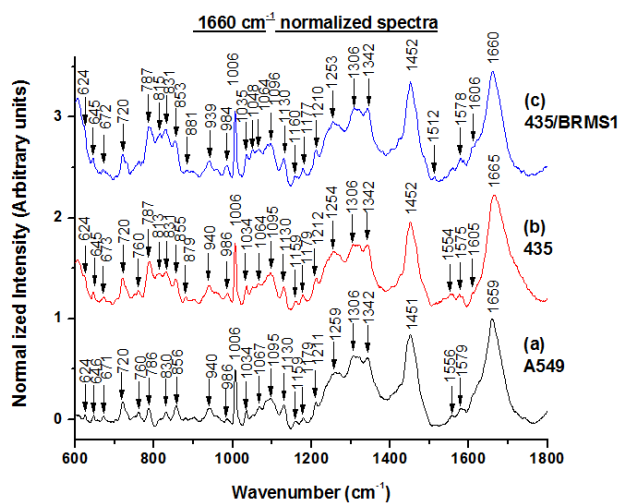

**Fig. S1** Mean Raman spectra of three cancer cell lines: A549 (a-black), 435 (b-red), and 435/BRMS1 (c-blue). Each spectrum is the average of five spectra, the averaged background was subtracted by finding a local minimum area, spectra were baseline corrected, and then normalized using peak intensity at 1660 cm<sup>-1</sup>. Spectra are offset vertically for clarity.

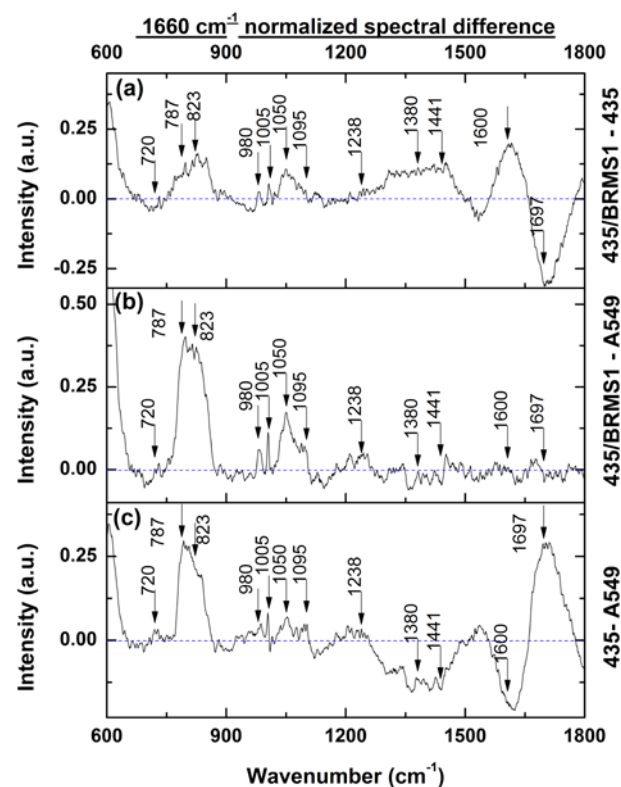

**Fig. S2** Difference spectra computed from the 1660 cm<sup>-1</sup> normalized spectrum in **Error! Reference source not found.** using A549, 435, and 435/BRMS1: 435/BRMS1 – A549 (a); 435/BRMS1 – A549 (b); A549 – 435 (c).

## Notes and references

<sup>a</sup> Department of Biological Engineering, Utah State University, Logan, Utah 84322-4105, U.S.A.; E-mail: Anhong.Zhou@usu.edu

<sup>b</sup> Department of Computer Science, Utah State University, Logan, Utah 84322-4205, U.S.A.

<sup>c</sup> Department of Biology, Utah State University, Logan, Utah 84322-5305, U.S.A.

<sup>‡</sup> The first two authors contributed equally to this work

---

§ Research and Development, Thermo Fisher Scientific, Logan, UT  
84321, USA. Email: gerald.mcewen@thermo.com

¶ Current address: Department of Microbiology and Immunology,  
5 College of Medicine, University of Illinois at Chicago, Chicago, IL 60612  
USA. Email: yzwu@uic.edu

|| Current address: Dean's Office, College of Science, Washington State  
University, Pullman, WA 99164-3520
